# Supplementary material for: Photostability and photobactericidal properties of porphyrin-layered double hydroxide–polyurethane composite films
Source: Royal Society of Chemistry journal article supplement (doi:10.1039/c3tb20070a), 2013-01-01

## Supporting Information

**Figure SI1.** Powder X-ray diffraction pattern of : A) PdTPPC-Zn<sub>2</sub>Al filler and of PdTPPC-Zn<sub>2</sub>Al/PU composite (Diffraction lines are indexed considering R-3m space group and 3R<sub>1</sub> polytype) ; B) CO<sub>3</sub>- Zn<sub>2</sub>Al filler

**A**

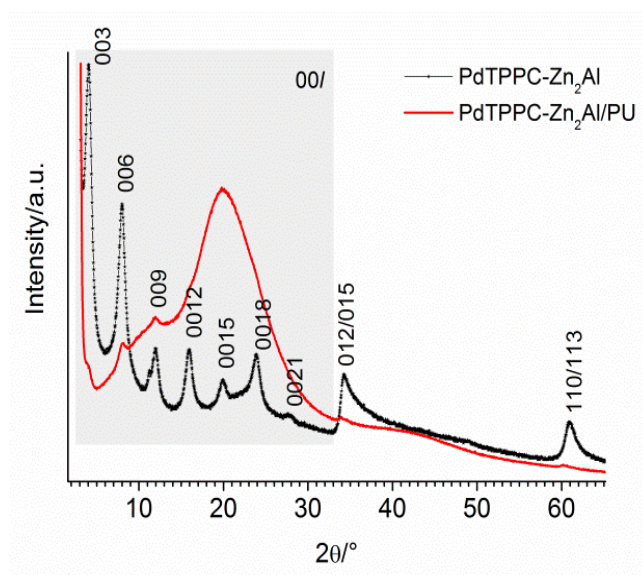

**B**

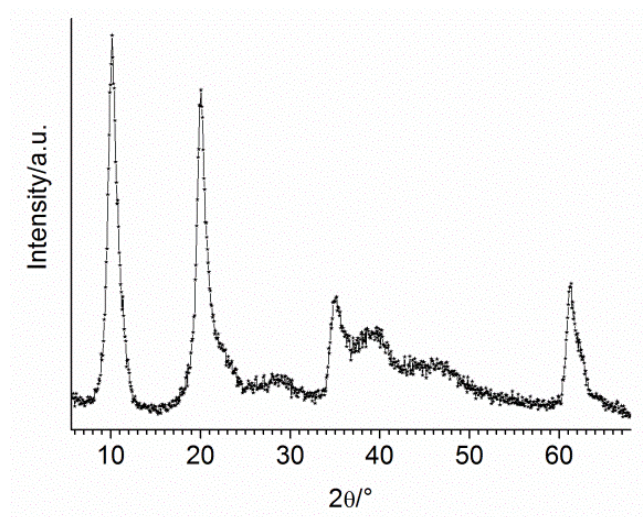

The XRD patterns of PdTPPC-Zn<sub>2</sub>Al/PU composite film shows a poor signal likely to be due to the low concentration of porphyrin-LDH filler, only 1 wt%. The amorphous like-halo between 15–30°/2θ is ascribed to the polymer itself. The interlayer distances *d* deduced from

the position of the first diffraction line are consistent with the presence of (A) PdTPPC ( $d \sim 23.0 \text{ \AA}$ ) and (B)  $\text{CO}_3$  ( $d \sim 7.8 \text{ \AA}$ ) intercalated LDH phases.

**Figure SI2.** Change in UV-Vis spectrum of PdTPPC- $\text{Zn}_2\text{Al/PU}$  composite film with exposure at 410 nm (irradiance of  $8 \text{ W.m}^{-2}$ ) as a function of time.

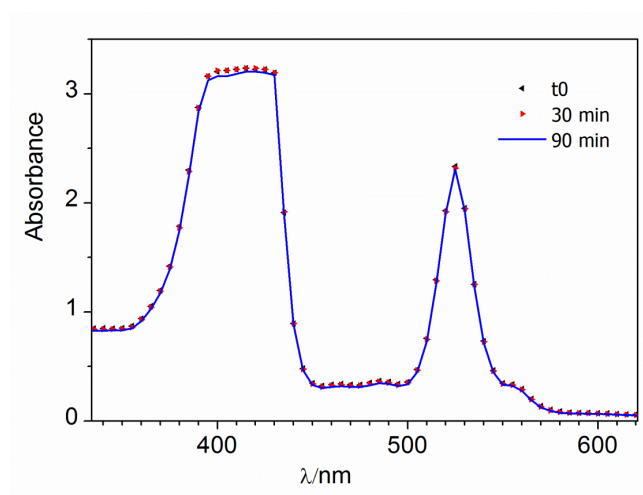

**Figure SI3.** Photophysical measurements PdTPPC- $\text{Zn}_2\text{Al/PU}$  composite film: A) Emission spectra recorded in air; B) Stern-Volmer plot calculated from PdTPPC phosphorescence decay kinetic curves recorded under different oxygen pressures (**Figure 2A**).

**A**

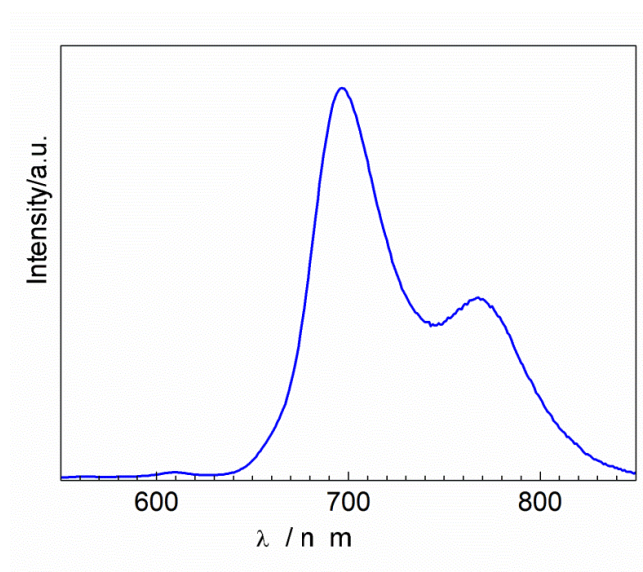

**B**

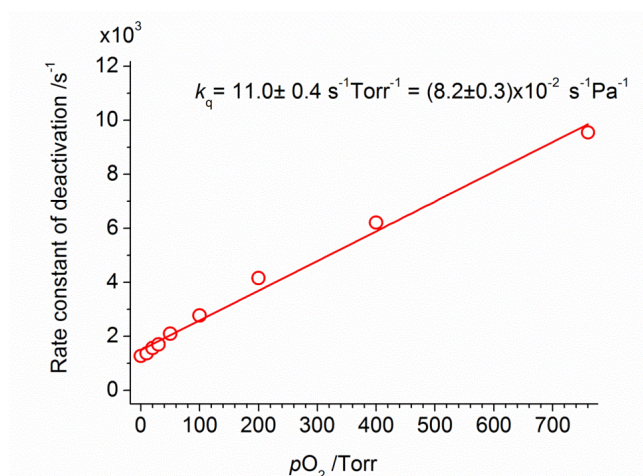

**Figure SI4.** ATR-IR spectra of A) PU and B) CO<sub>3</sub>-Zn<sub>2</sub>Al/PU films before and after oxygen consumption experiments depicted in **Figure 3**.

**A**

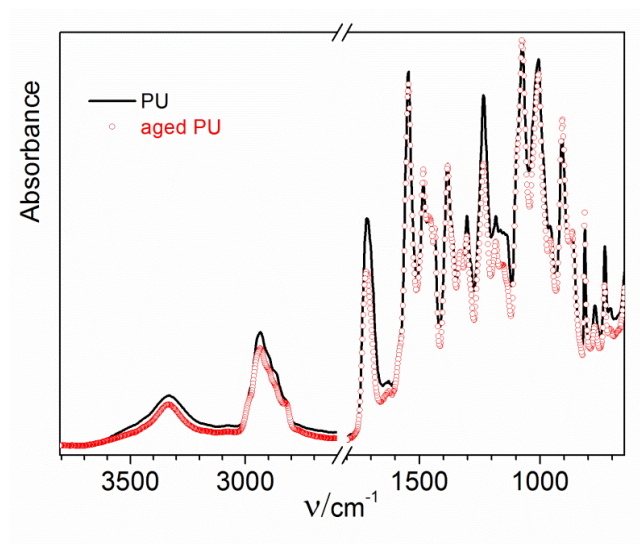

**B**

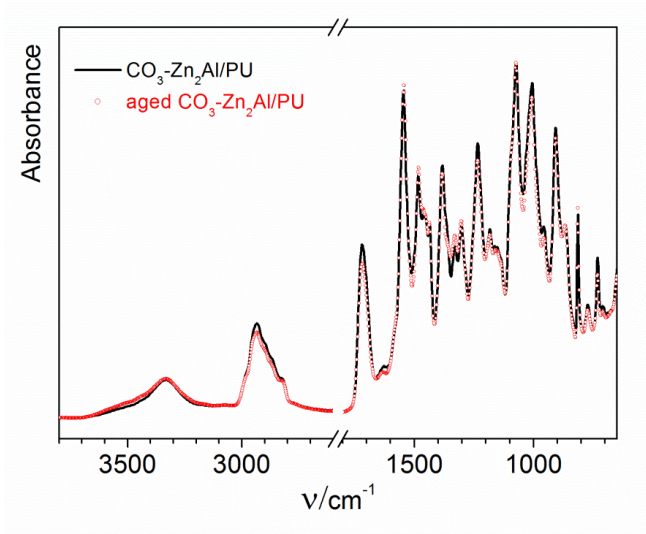

Supplement: c3tb20070a.pdf [file c3tb20070a.pdf]
